# Supplementary material
Source: PubMed Central journal article supplement (PMC9283522)
Supplement: 41398_2022_2052_MOESM2_ESM.pdf [file 41398_2022_2052_MOESM2_ESM.pdf]

**Supplementary Table 1. Summary data from all GWAS used in current study.**

| Disease                       | abbreviation | Cases   | Controls  | Ethnics | Number of SNPs | PMID     |
|-------------------------------|--------------|---------|-----------|---------|----------------|----------|
| susceptibility of COVID-19    | n.d.         | 112,612 | 2,474,079 | Mixed   | 12,222,969     | 32404885 |
| hospitalization of COVID-19   | n.d.         | 24,274  | 2,061,529 | Mixed   | 11,810,332     | 32404885 |
| severity of COVID-19          | n.d.         | 8,779   | 1,001,875 | Mixed   | 8,141,091      | 32404885 |
| Parkinson's disease           | PD           | 33,674  | 449,056   | EUR     | 17,510,617     | 31701892 |
| Alzheimer's disease           | AD           | 71,880  | 383,378   | EUR     | 13,367,299     | 30617256 |
| amyotrophic lateral sclerosis | ALS          | 20,806  | 59,804    | EUR     | 10,031,417     | 29566793 |
| multiple sclerosis            | MS           | 47,429  | 68,374    | EUR     | 6,304,358      | 31604244 |
| Lewy body dementia            | LBD          | 2,591   | 4,027     | EUR     | 7,654,310      | 33589841 |
| frontotemporal dementia       | FTD          | 3,526   | 9,402     | EUR     | 6,026,384      | 24943344 |

EUR, European; Mixed ethnics denotes individuals from different ancestry like Asian, European, American and African; SNP, single nucleotide polymorphism; GWAS, genome-wide association study; PMID, PubMed ID; n.d., not defined.
